# Supplementary material for: [18F]SPA-RQ/PET Study of NK1 receptors in the Whole Body of Guinea Pig and Rat
Source: PubMed Central journal article supplement (PMC6938475; doi:10.1038/s41598-019-56848-3), 2019-12-31
Supplement: 41598_2019_56848_MOESM1_ESM.pdf [file 41598_2019_56848_MOESM1_ESM.pdf]

Electronic Supplementary Material

[<sup>18</sup>F]SPA-RQ/PET Study of NK1 receptors in the Whole Body of Guinea Pig and Rat

Tove J. Grönroos<sup>1,2</sup>, Sarita Forsback<sup>1,3</sup>, Olli Eskola<sup>1</sup>, Jörgen Bergman<sup>1</sup>, Päivi Marjamäki<sup>1</sup>, Eliisa Löyttyniemi<sup>4</sup>, Jarmo Hietala<sup>1,5</sup>, Merja Haaparanta-Solin<sup>1,2</sup>, Olof Solin<sup>1,3,6</sup>

<sup>1</sup>Turku PET Centre, University of Turku, Turku, Finland

<sup>2</sup>Medicity Research Laboratory, University of Turku, Turku, Finland

<sup>3</sup>Department of Chemistry, University of Turku, Turku, Finland

<sup>4</sup>Department of Biostatistics, University of Turku, Finland

<sup>5</sup>Department of Psychiatry, Turku University Hospital, Turku, Finland

<sup>6</sup>Accelerator Laboratory, Åbo Akademi University, Turku, Finland

Table 1. Biodistribution of [<sup>18</sup>F]SPA-RQ in nonmedicated (nonmed) or in guinea pigs premedicated (premed) with a NK1 selective antagonist. Data in all groups are mean ± SD %ID/g of three animals.

| Tissue            | 15 min                   |             | 60 min                   |             | 180 min                  |             | 360 min                  |                          |
|-------------------|--------------------------|-------------|--------------------------|-------------|--------------------------|-------------|--------------------------|--------------------------|
|                   | Nonmed                   | Premed      | Nonmed                   | Premed      | Nonmed                   | Premed      | Nonmed                   | Premed                   |
| Blood             | 0.12 ± 0.04              | 0.12 ± 0.05 | 0.08 ± 0.01              | 0.08 ± 0.03 | 0.03 ± 0.01              | 0.06 ± 0.02 | 0.01 ± 0.00              | 0.01 ± 0.00              |
| Fat (subcutan)    | 0.12 ± 0.05              | 0.09 ± 0.05 | 0.14 ± 0.01              | 0.17 ± 0.01 | 0.07 ± 0.02              | 0.11 ± 0.05 | 0.02 ± 0.00              | 0.02 ± 0.01              |
| Fat (mesenterial) | 0.18 ± 0.08              | 0.11 ± 0.06 | 0.15 ± 0.03              | 0.19 ± 0.02 | 0.08 ± 0.01              | 0.11 ± 0.02 | 0.02 ± 0.00              | 0.01 ± 0.00              |
| Muscle            | 0.06 ± 0.01              | 0.05 ± 0.04 | 0.06 ± 0.01              | 0.08 ± 0.01 | 0.02 ± 0.01              | 0.04 ± 0.02 | 0.01 ± 0.00              | 0.01 ± 0.00              |
| Myocardium        | 0.38 ± 0.14              | 0.31 ± 0.13 | 0.16 ± 0.02              | 0.17 ± 0.01 | 0.06 ± 0.02              | 0.08 ± 0.03 | 0.02 ± 0.00              | 0.01 ± 0.00              |
| Lung              | 18 ± 9                   | 3.6 ± 1.7   | 2.0 ± 1.2                | 3.7 ± 1.8   | 0.85 ± 0.23              | 1.1 ± 0.67  | 0.29 ± 0.04              | 0.11 ± 0.03              |
| Kidney            | 0.99 ± 0.32              | 0.70 ± 0.40 | 0.54 ± 0.10              | 0.46 ± 0.07 | 0.18 ± 0.07              | 0.34 ± 0.08 | 0.10 ± 0.03 <sup>a</sup> | 0.05 ± 0.00 <sup>a</sup> |
| Adrenal gland     | 0.64 ± 0.15              | 0.61 ± 0.39 | 0.39 ± 0.04              | 0.38 ± 0.07 | 0.10 ± 0.04              | 0.20 ± 0.11 | 0.03 ± 0.01              | 0.03 ± 0.01              |
| Liver             | 0.24 ± 0.06              | 0.39 ± 0.31 | 0.14 ± 0.02              | 0.24 ± 0.05 | 0.05 ± 0.01              | 0.10 ± 0.04 | 0.02 ± 0.00              | 0.02 ± 0.01              |
| Spleen            | 1.4 ± 0.51               | 1.0 ± 0.53  | 0.66 ± 0.13              | 0.40 ± 0.08 | 0.18 ± 0.07              | 0.20 ± 0.09 | 0.05 ± 0.01              | 0.02 ± 0.01              |
| Pancreas          | 0.89 ± 0.38              | 0.42 ± 0.24 | 0.92 ± 0.12              | 0.24 ± 0.01 | 0.58 ± 0.09              | 0.12 ± 0.06 | 0.21 ± 0.05              | 0.01 ± 0.01              |
| Gall bladder      | 0.25 ± 0.10              | 0.23 ± 0.17 | 0.36 ± 0.08              | 0.23 ± 0.04 | 0.15 ± 0.06              | 0.14 ± 0.07 | 0.07 ± 0.03              | 0.06 ± 0.05              |
| Stomach (wall)    | 0.22 ± 0.05              | 0.10 ± 0.06 | 0.14 ± 0.02              | 0.10 ± 0.02 | 0.06 ± 0.01              | 0.06 ± 0.02 | 0.03 ± 0.01              | 0.04 ± 0.04              |
| Small intestine   | 0.94 ± 0.24              | 0.50 ± 0.33 | 0.82 ± 0.14              | 0.28 ± 0.06 | 0.64 ± 0.19              | 0.17 ± 0.03 | 0.30 ± 0.08              | 0.03 ± 0.01              |
| Large intestine   | 0.44 ± 0.09              | 0.25 ± 0.20 | 0.52 ± 0.01              | 0.25 ± 0.10 | 0.57 ± 0.03              | 0.20 ± 0.11 | 0.55 ± 0.11              | 0.02 ± 0.00              |
| Urine             | 0.52 ± 0.46              | 0.57 ± 0.78 | 8.3 ± 5.7                | 0.63 ± 0.07 | 3.7 ± 4.7 <sup>a</sup>   | 3.1 ± 0.5   | 1.2 ± 0.2                | 0.85 ± 0.42              |
| Urinary bladder   | 0.15 ± 0.05              | 0.15 ± 0.10 | 0.31 ± 0.05              | 0.11 ± 0.01 | 0.24 ± 0.06              | 0.10 ± 0.03 | 0.18 ± 0.03              | 0.01 ± 0.00              |
| Uterus            | 0.13 ± 0.02              | 0.12 ± 0.09 | 0.20 ± 0.02              | 0.12 ± 0.01 | 0.21 ± 0.05              | 0.08 ± 0.02 | 0.16 ± 0.02              | 0.01 ± 0.00              |
| Bone (skull)      | 0.07 ± 0.02              | 0.05 ± 0.03 | 0.23 ± 0.03              | 0.29 ± 0.09 | 0.46 ± 0.07              | 0.52 ± 0.11 | 0.73 ± 0.05              | 0.99 ± 0.19              |
| Bone marrow       | 0.39 ± 0.12              | 0.38 ± 0.24 | 0.29 ± 0.05              | 0.38 ± 0.08 | 0.11 ± 0.02              | 0.19 ± 0.02 | 0.04 ± 0.02              | 0.06 ± 0.05              |
| Skin              | 0.12 ± 0.05              | 0.06 ± 0.03 | 0.09 ± 0.03              | 0.11 ± 0.01 | 0.13 ± 0.02              | 0.09 ± 0.02 | 0.13 ± 0.07              | 0.04 ± 0.01              |
| Thymus            | 0.21 ± 0.07              | 0.15 ± 0.09 | 0.20 ± 0.02              | 0.18 ± 0.02 | 0.10 ± 0.02              | 0.09 ± 0.03 | 0.02 ± 0.00 <sup>a</sup> | 0.01 ± 0.00              |
| Thyroid gland     | 0.15 ± 0.04              | 0.12 ± 0.08 | 0.10 ± 0.02              | 0.14 ± 0.02 | 0.05 ± 0.01              | 0.06 ± 0.02 | 0.02 ± 0.01              | 0.01 ± 0.00              |
| Eyeball           | 0.08 ± 0.02              | 0.03 ± 0.02 | 0.06 ± 0.01              | 0.03 ± 0.00 | 0.04 ± 0.01              | 0.02 ± 0.01 | 0.03 ± 0.00              | 0.01 ± 0.00              |
| Cortex            | 0.07 ± 0.04              | 0.05 ± 0.03 | 0.06 ± 0.01              | 0.03 ± 0.00 | 0.03 ± 0.01              | 0.01 ± 0.01 | 0.01 ± 0.00              | 0.01 ± 0.00              |
| Striatum          | 0.18 ± 0.05 <sup>b</sup> | 0.05 ± 0.04 | 0.21 ± 0.03 <sup>b</sup> | 0.03 ± 0.00 | 0.21 ± 0.05 <sup>b</sup> | 0.01 ± 0.01 | 0.10 ± 0.02 <sup>b</sup> | 0.01 ± 0.00              |
| Cerebellum        | 0.06 ± 0.02              | 0.05 ± 0.04 | 0.03 ± 0.00              | 0.03 ± 0.00 | 0.01 ± 0.00              | 0.02 ± 0.00 | 0.01 ± 0.00              | 0.01 ± 0.00              |

<sup>a</sup>n = 2, <sup>b</sup>Data achieved from autoradiography study.

Table 2. Biodistribution of [<sup>18</sup>F]SPA-RQ in nonmedicated rat. Data are mean ± SD %ID/g of two animals.

| Tissue            | 60 min                   |
|-------------------|--------------------------|
| Blood             | 0.09 ± 0.02              |
| Fat (subcutan)    | 0.20 ± 0.04              |
| Fat (mesenterial) | 0.38 ± 0.18              |
| Muscle            | 0.13 ± n.a. <sup>a</sup> |
| Myocardium        | 0.22 ± 0.02              |
| Lung              | 1.9 ± 0.2                |
| Kidney            | 1.0 ± 0.26               |
| Adrenal gland     | 0.85 ± 0.24              |
| Liver             | 1.8 ± 0.11               |
| Spleen            | 0.90 ± 0.10              |
| Pancreas          | 0.39 ± 0.03              |
| Gall bladder      | n.a.                     |
| Stomach (wall)    | 0.13 ± 0.01              |
| Small intestine   | 0.63 ± 0.10              |
| Large intestine   | 0.21 ± 0.01              |
| Urine             | 3.8 ± 1.6                |
| Urinary bladder   | 0.47 ± 0.24              |
| Testes            | 0.08 ± 0.01              |
| Bone (skull)      | 0.39 ± 0.10              |
| Bone marrow       | 0.71 ± 0.11              |
| Skin              | 0.16 ± 0.01              |
| Thymus            | 0.57 ± 0.21              |
| Thyroid gland     | 0.54 ± 0.10              |
| Eyeball           | 0.05 ± n.a. <sup>a</sup> |
| Cortex            | 0.04 ± 0.01              |
| Striatum          | 0.03 ± n.a. <sup>a</sup> |
| Cerebellum        | 0.03 ± 0.00              |

n.a. = not available, <sup>a</sup>n = 1
